# Supplementary material
Source: publisher site journal article supplement (https://www.dovepress.com/article/374782)
Supplement: Supplementary file 1 [file get_supplementary_file.php]

## *Supplementary Material*

**Appendix 1 Medical service fee standard (unit: yuan)**

| Item                      | Tertiary hospital   |                        |                      | Secondary hospital  |                        |                      | Primary hospital    |                        |                      |
|---------------------------|---------------------|------------------------|----------------------|---------------------|------------------------|----------------------|---------------------|------------------------|----------------------|
|                           | Medical service fee | Reimbursement          | Out-of-pocket amount | Medical service fee | Reimbursement          | Out-of-pocket amount | Medical service fee | Reimbursement          | Out-of-pocket amount |
| General outpatient clinic | 50                  | 40                     | 10                   | 30                  | 28                     | 2                    | 20                  | 19                     | 1                    |
| Deputy chief physician    | 60                  |                        | 20                   | 50                  |                        | 20                   | 40                  |                        | 20                   |
| Chief physician           | 80                  |                        | 40                   | 70                  |                        | 40                   | 60                  |                        | 40                   |
| Well-known experts        | 100                 |                        | 60                   | 90                  |                        | 60                   | 80                  |                        | 60                   |
| Emergency                 | 70                  | 60                     | 10                   | 50                  | 48                     | 2                    | 40                  | 39                     | 1                    |
| Hospitalized              | 100                 | Prorated reimbursement |                      | 60                  | Prorated reimbursement |                      | 50                  | Prorated reimbursement |                      |

## *Supplementary Material*

### **Appendix 2 Status of Deaths by Age and Sex (2018.11.1-2019.10.31)**

---

| Age | Average Average<br>(person) | Male  | Female | Deaths (person) |
|-----|-----------------------------|-------|--------|-----------------|
| 40  | 15451                       | 7887  | 7564   | 17              |
| 41  | 15122                       | 7686  | 7436   | 18              |
| 42  | 14093                       | 7185  | 6908   | 8               |
| 43  | 16033                       | 8168  | 7865   | 23              |
| 44  | 16400                       | 8346  | 8054   | 28              |
| 45  | 17704                       | 8996  | 8708   | 27              |
| 46  | 18513                       | 9435  | 9078   | 34              |
| 47  | 19058                       | 9710  | 9348   | 29              |
| 48  | 19398                       | 9896  | 9502   | 40              |
| 49  | 21030                       | 10672 | 10358  | 38              |
| 50  | 19151                       | 9698  | 9453   | 66              |
| 51  | 20921                       | 10580 | 10341  | 51              |
| 52  | 16712                       | 8420  | 8292   | 62              |
| 53  | 18300                       | 9250  | 9050   | 52              |
| 54  | 18214                       | 9225  | 8989   | 72              |
| 55  | 17703                       | 8898  | 8805   | 79              |
| 56  | 20373                       | 10298 | 10075  | 95              |
| 57  | 16776                       | 8427  | 8349   | 49              |
| 58  | 8840                        | 4369  | 4471   | 43              |
| 59  | 10580                       | 5331  | 5249   | 68              |
| 60  | 9589                        | 4872  | 4717   | 69              |
| 61  | 12351                       | 6265  | 6086   | 106             |
| 62  | 13590                       | 6852  | 6738   | 115             |

|       |        |        |        |      |
|-------|--------|--------|--------|------|
| 63    | 12562  | 6240   | 6322   | 130  |
| 64    | 12882  | 6419   | 6463   | 123  |
| 65    | 12881  | 6370   | 6511   | 144  |
| 66    | 11895  | 5830   | 6065   | 150  |
| 67    | 11543  | 5663   | 5880   | 137  |
| 68    | 9661   | 4689   | 4972   | 140  |
| 69    | 9502   | 4667   | 4835   | 175  |
| 70    | 8973   | 4438   | 4535   | 174  |
| 71    | 7649   | 3729   | 3920   | 148  |
| 72    | 7203   | 3506   | 3697   | 188  |
| 73    | 6487   | 3109   | 3378   | 164  |
| 74    | 5800   | 2758   | 3042   | 163  |
| 75    | 5409   | 2608   | 2801   | 157  |
| 76    | 4788   | 2260   | 2528   | 172  |
| 77    | 4509   | 2112   | 2397   | 182  |
| 78    | 4367   | 1988   | 2379   | 157  |
| 79    | 3939   | 1827   | 2112   | 155  |
| 80    | 3371   | 1510   | 1861   | 231  |
| Total | 519323 | 260189 | 259134 | 4079 |
